# Supplementary material
Source: PubMed Central journal article supplement (PMC8388819)
Supplement: aem.01110-21-s0001.pdf [file aem.01110-21-s0001.pdf]

## Supplemental Material

### **Characterization and molecular analysis of the viable but nonculturable state of a yeast *Candida* sp. strain LN1 induced by high phenol concentrations**

Mengqi Xie<sup>1</sup>, Luning Xu<sup>1</sup>, Rong Zhang<sup>1</sup>, Yan Zhou<sup>2,3</sup>, Yeyuan Xiao<sup>4</sup>, Xiaomei Su<sup>1,\*</sup>,  
Chaofeng Shen<sup>5</sup>, Faqian Sun<sup>1</sup>, Muhammad Zaffar Hashmi<sup>6</sup>, Hongjun Lin<sup>1</sup>, Jianrong  
Chen<sup>1</sup>

<sup>1</sup>*College of Geography and Environmental Science, Zhejiang Normal University,  
Jinhua 321004, China*

<sup>2</sup>*Advanced Environmental Biotechnology Centre, Nanyang Environment and Water  
Research Institute, Nanyang Technological University, 637141, Singapore*

<sup>3</sup>*School of Civil and Environmental Engineering, Nanyang Technological University,  
639798, Singapore*

<sup>4</sup>*Department of Civil and Environmental Engineering, Shantou University, Shantou  
515063, China*

<sup>5</sup>*Department of Environmental Engineering, College of Environmental and Resource  
Sciences, Zhejiang University, Hangzhou, 310058, China*

<sup>6</sup>*Department of Meteorology, COMSATS University, Islamabad, 44000, Pakistan*

\*Corresponding author: Xiaomei Su

Address: Yingbin Road 688#, Jinhua, 321004, China

E-mail: purple@zjnu.cn

**Table S1** Information and quality of Illumina whole-genome sequencing of the strain LN1.

| Sample | R1       |           |        |        | R2       |           |        |        |
|--------|----------|-----------|--------|--------|----------|-----------|--------|--------|
|        | R1_reads | R1_bases  | Q20    | Q30    | R2_reads | R2_bases  | Q20    | Q30    |
| LN1    | 5350439  | 794571467 | 0.9867 | 0.9529 | 5350439  | 792751210 | 0.9800 | 0.9346 |

**Table S2** Genome assembly and annotation statistics of LN1 and the most closely related strain MYA-3404.

|                                   | LN1      | MYA-3404 |
|-----------------------------------|----------|----------|
| <b>Assembly statistics</b>        |          |          |
| Assembly length ( $\geq 1000$ bp) | 14463479 | 14630139 |
| Contigs ( $\geq 1000$ bp)         | 660      | 24       |
| Scaffold N50 (bp)                 | 61951    | 1654078  |
| Scaffold L50                      | 72       | 4        |
| Scaffold N75 (bp)                 | 29321    | 1255791  |
| Scaffold L75                      | 158      | 6        |
| GC content of genome (%)          | 33.06    | 33.15    |
| N's per 100 kbp                   | 0        | 372.79   |
| <b>Gene statistics</b>            |          |          |
| Number of genes                   | 6504     | 6441     |
| Number of exons                   | 7034     | 6475     |
| Number of introns                 | 530      | 34       |
| Number of CDS                     | 6504     | 6254     |
| Total gene length                 | 9369400  | 9122989  |
| Gene length (bp, average)         | 1441     | 1416     |
| CDS length (bp, average)          | 1428     | 1455     |
| Exon Length (bp, average)         | 1320     | 1408     |
| Intron length (bp, average)       | 161      | 201      |
| % of genome covered by genes      | 64       | 62.4     |
| % of genome covered by CDS        | 63.4     | 62.2     |
| <b>Functional annotations</b>     |          |          |
| Genes with KEGG annotation        | 3448     | 3322     |
| Genes with Pfam domain            | 4403     | 4296     |
| Genes with SignalP peptide        | 417      | 429      |

**Table S3** Raman bands observed in spectra of LN1 cells and tentative assignment.

| Wavelength<br>( $\text{cm}^{-1}$ ) | Assignment                                                                  | Reference |
|------------------------------------|-----------------------------------------------------------------------------|-----------|
| 1125                               | (COC) Symmetric glycosidic link<br>(C–N) and n (C–C)                        | (1, 2)    |
| 1338                               | AMP, GMP, as well as to the aromatic amino<br>acids tyrosine and tryptophan | (3)       |
| 1445                               | CH <sub>2</sub> bending mode of proteins and lipids                         | (4, 5)    |
| 1575                               | DNA bases guanine and adenine                                               | (1, 5)    |
| 1665                               | Amide I                                                                     | (5, 6)    |
| 2935                               | stretching vibrations of CH <sub>2</sub> and CH <sub>3</sub>                | (5)       |

**Table S4** An overview of the Illumina high throughput RNA-sequencing statistics.

| <b>R1</b>     |          |            |         |         |         |        |        |
|---------------|----------|------------|---------|---------|---------|--------|--------|
| <b>sample</b> | sequence | base       | min_len | max_len | avg_len | Q20    | Q30    |
| <b>CG1</b>    | 17616833 | 2617696439 | 36      | 150     | 148.59  | 0.9855 | 0.95   |
| <b>CG2</b>    | 18486034 | 2745932896 | 36      | 150     | 148.54  | 0.9854 | 0.9498 |
| <b>CG3</b>    | 22795240 | 3386672538 | 36      | 150     | 148.57  | 0.9856 | 0.9501 |
| <b>TG1</b>    | 18235369 | 2713360377 | 36      | 150     | 148.8   | 0.986  | 0.9502 |
| <b>TG2</b>    | 17632919 | 2618253145 | 36      | 150     | 148.49  | 0.9849 | 0.9473 |
| <b>TG3</b>    | 18412994 | 2735302269 | 36      | 150     | 148.55  | 0.985  | 0.9473 |
| <b>R2</b>     |          |            |         |         |         |        |        |
| <b>sample</b> | sequence | base       | min_len | max_len | avg_len | Q20    | Q30    |
| <b>CG1</b>    | 17616833 | 2624025923 | 36      | 150     | 148.95  | 0.9845 | 0.9433 |
| <b>CG2</b>    | 18486034 | 2753681348 | 36      | 150     | 148.96  | 0.9848 | 0.9443 |
| <b>CG3</b>    | 22795240 | 3393169959 | 36      | 150     | 148.85  | 0.9834 | 0.9402 |
| <b>TG1</b>    | 18235369 | 2703368861 | 36      | 150     | 148.25  | 0.9756 | 0.92   |
| <b>TG2</b>    | 17632919 | 2612522548 | 36      | 150     | 148.16  | 0.9775 | 0.9249 |
| <b>TG3</b>    | 18412994 | 2725237698 | 36      | 150     | 148.01  | 0.9752 | 0.9192 |

**Table S5** 98 up-regulated genes with expression ration of  $|\log_2 \text{TG/CG}| > 3.0$ .

| <b>Gene ID</b> | <b>TG_base<br/>Mean</b> | <b>CG_base<br/>Mean</b> | <b>log<sub>2</sub><br/>ratio</b> | <b>Regula<br/>tion</b> | <b>Annotation</b>                                        |
|----------------|-------------------------|-------------------------|----------------------------------|------------------------|----------------------------------------------------------|
| LN1_1979.t     | 798.75                  | 2.20                    | 8.56                             | Up                     | Spore wall maturation protein DIT1                       |
| LN1_1980.t     | 473.11                  | 1.82                    | 7.95                             | Up                     | Cytochrome P450                                          |
| LN1_1648.t     | 39.96                   | 0.34                    | 6.82                             | Up                     | Unknown                                                  |
| LN1_5013.t     | 39.96                   | 0.34                    | 6.82                             | Up                     | Unknown                                                  |
| LN1_2044.t     | 564.04                  | 6.18                    | 6.52                             | Up                     | MFS antiporter QDR1                                      |
| LN1_4912.t     | 385.05                  | 4.86                    | 6.29                             | Up                     | Mitogen-activated protein kinase                         |
| LN1_2090.t     | 1406.42                 | 18.98                   | 6.21                             | Up                     | Putative aryl-alcohol dehydrogenase                      |
| LN1_2615.t     | 2538.57                 | 38.06                   | 6.06                             | Up                     | Unknown                                                  |
| LN1_5210.t     | 344.72                  | 6.71                    | 5.68                             | Up                     | Unknown                                                  |
| LN1_1174.t     | 33.39                   | 0.80                    | 5.55                             | Up                     | Unknown                                                  |
| LN1_2355.t     | 65.81                   | 1.42                    | 5.54                             | Up                     | Unknown                                                  |
| LN1_2756.t     | 16612.34                | 408.69                  | 5.35                             | Up                     | Catabolic L-serine/threonine<br>dehydratase              |
| LN1_0877.t     | 750.57                  | 19.33                   | 5.28                             | Up                     | Unknown                                                  |
| LN1_4976.t     | 1141.84                 | 31.09                   | 5.20                             | Up                     | Unknown                                                  |
| LN1_5864.t     | 8932.33                 | 281.09                  | 4.99                             | Up                     | Unknown                                                  |
| LN1_3339.t     | 1230.73                 | 40.16                   | 4.94                             | Up                     | Multidrug resistance protein 1                           |
| LN1_3902.t     | 103.11                  | 3.81                    | 4.77                             | Up                     | Unknown                                                  |
| LN1_2724.t     | 947.72                  | 36.00                   | 4.72                             | Up                     | Putative NADPH-dependent<br>methylglyoxal reductase GRP2 |
| LN1_5742.t     | 74.72                   | 3.02                    | 4.62                             | Up                     | Iron transport multicopper oxidase FET3                  |
| LN1_4934.t     | 31846.92                | 1307.95                 | 4.61                             | Up                     | Transaminated amino acid<br>decarboxylase                |
| LN1_5442.t     | 450.64                  | 19.01                   | 4.56                             | Up                     | Unknown                                                  |
| LN1_1843.t     | 56.16                   | 2.65                    | 4.40                             | Up                     | Vitamin H transporter 1                                  |
| LN1_4585.t     | 91.10                   | 4.69                    | 4.33                             | Up                     | Unknown                                                  |
| LN1_2664.t     | 67.86                   | 3.48                    | 4.30                             | Up                     | Lipase 8                                                 |
| LN1_4596.t     | 7594.43                 | 401.32                  | 4.24                             | Up                     | Probable quinate permease                                |
| LN1_0275.t     | 36.17                   | 2.01                    | 4.16                             | Up                     | Transcriptional regulator EFH1                           |
| LN1_4493.t     | 1059.11                 | 59.81                   | 4.15                             | Up                     | DNA polymerase alpha catalytic subunit<br>A              |
| LN1_1981.t     | 3839.00                 | 223.09                  | 4.10                             | Up                     | Dityrosine transporter 1                                 |
| LN1_1286.t     | 139.00                  | 8.11                    | 4.10                             | Up                     | Unknown                                                  |
| LN1_4412.t     | 183.22                  | 11.28                   | 4.03                             | Up                     | Azole resistance protein 1                               |
| LN1_3646.t     | 2098.44                 | 129.48                  | 4.02                             | Up                     | Ribonucleoside-diphosphate reductase<br>large chain 1    |
| LN1_2483.t     | 250.57                  | 15.81                   | 3.99                             | Up                     | Unknown                                                  |
| LN1_0574.t     | 428.04                  | 27.99                   | 3.94                             | Up                     | Structural maintenance of chromosomes<br>protein 3       |
| LN1_1056.t     | 326.39                  | 21.53                   | 3.92                             | Up                     | DNA primase large subunit                                |
| LN1_6310.t     | 331.30                  | 22.28                   | 3.90                             | Up                     | Serine/threonine-protein kinase RAD53                    |

|            |          |         |      |    |                                                      |
|------------|----------|---------|------|----|------------------------------------------------------|
| LN1_6464.t | 44.68    | 3.00    | 3.84 | Up | Unknown                                              |
| LN1_3058.t | 265.39   | 19.23   | 3.79 | Up | Unknown                                              |
| LN1_1326.t | 1046.26  | 78.64   | 3.73 | Up | Proliferating cell nuclear antigen                   |
| LN1_0905.t | 418.30   | 31.77   | 3.72 | Up | DNA polymerase alpha subunit B                       |
| LN1_4399.t | 451.45   | 34.68   | 3.70 | Up | Unknown                                              |
| LN1_5172.t | 4999.62  | 386.22  | 3.70 | Up | Unknown                                              |
| LN1_1473.t | 161.70   | 12.98   | 3.66 | Up | Uracil-DNA glycosylase                               |
| LN1_3139.t | 12705.67 | 1043.78 | 3.61 | Up | Glycine dehydrogenase                                |
| LN1_3140.t | 12706.01 | 1044.22 | 3.60 | Up | Glycine dehydrogenase                                |
| LN1_5184.t | 457.79   | 38.00   | 3.59 | Up | Threonylcarbamoyl-AMP synthase                       |
| LN1_1827.t | 114.54   | 9.66    | 3.59 | Up | Unknown                                              |
| LN1_1230.t | 429.59   | 35.94   | 3.58 | Up | Vacuolar basic amino acid transporter 5              |
| LN1_5009.t | 20373.34 | 1727.90 | 3.56 | Up | Cell wall acid trehalase ATC1                        |
| LN1_2751.t | 225.46   | 19.14   | 3.56 | Up | Unknown                                              |
| LN1_3407.t | 114.28   | 9.70    | 3.55 | Up | Unknown                                              |
| LN1_3065.t | 89.34    | 7.74    | 3.52 | Up | Unknown                                              |
| LN1_6363.t | 939.35   | 81.82   | 3.52 | Up | Deoxyuridine 5'-triphosphate<br>nucleotidohydrolase  |
| LN1_5867.t | 388.78   | 34.01   | 3.51 | Up | Pirin-like protein                                   |
| LN1_2614.t | 182.93   | 16.02   | 3.51 | Up | Agglutinin-like protein 3                            |
| LN1_6316.t | 117.84   | 10.74   | 3.48 | Up | Oligopeptide transporter 2                           |
| LN1_3717.t | 713.63   | 64.42   | 3.47 | Up | Mediator of replication checkpoint<br>protein 1      |
| LN1_3722.t | 1323.06  | 120.14  | 3.46 | Up | Vacuolar basic amino acid transporter 5              |
| LN1_2212.t | 162.74   | 14.88   | 3.45 | Up | Unknown                                              |
| LN1_1168.t | 49.65    | 4.71    | 3.44 | Up | Unknown                                              |
| LN1_2504.t | 614.68   | 56.84   | 3.44 | Up | Histone chaperone ASF1                               |
| LN1_1129.t | 236.67   | 22.25   | 3.41 | Up | Unknown                                              |
| LN1_0988.t | 966.02   | 90.68   | 3.41 | Up | DNA topoisomerase 2                                  |
| LN1_1130.t | 236.34   | 22.25   | 3.41 | Up | Unknown                                              |
| LN1_2211.t | 162.73   | 15.57   | 3.39 | Up | Unknown                                              |
| LN1_1532.t | 1171.17  | 112.19  | 3.38 | Up | Probable metabolite transport protein<br>GIT1        |
| LN1_0210.t | 37.75    | 3.57    | 3.36 | Up | Cell wall protein RHD3                               |
| LN1_5188.t | 460.49   | 45.14   | 3.35 | Up | Unknown                                              |
| LN1_0725.t | 82.72    | 8.33    | 3.33 | Up | Unknown                                              |
| LN1_4865.t | 73.32    | 7.54    | 3.30 | Up | Protein ATC1                                         |
| LN1_2072.t | 911.51   | 93.10   | 3.29 | Up | Replication factor A protein 2                       |
| LN1_4282.t | 49.59    | 5.14    | 3.28 | Up | Probable ferric reductase<br>transmembrane component |
| LN1_5107.t | 206.91   | 21.30   | 3.28 | Up | Unknown                                              |
| LN1_2776.t | 31.18    | 3.27    | 3.27 | Up | Unknown                                              |
| LN1_4457.t | 375.46   | 39.14   | 3.26 | Up | DNA replication licensing factor MCM6                |
| LN1_1717.t | 115.13   | 12.25   | 3.23 | Up | Unknown                                              |

|            |          |         |      |    |                                                          |
|------------|----------|---------|------|----|----------------------------------------------------------|
| LN1_0672.t | 309.89   | 33.45   | 3.21 | Up | Unknown                                                  |
| LN1_1558.t | 1138.26  | 125.62  | 3.18 | Up | Putative aryl-alcohol dehydrogenase                      |
| LN1_4939.t | 103.49   | 11.42   | 3.18 | Up | Pheromone alpha factor receptor                          |
| LN1_5738.t | 374.93   | 41.77   | 3.17 | Up | Unknown                                                  |
| LN1_5040.t | 955.92   | 107.43  | 3.15 | Up | Unknown                                                  |
| LN1_4553.t | 521.04   | 59.01   | 3.14 | Up | Unknown                                                  |
| LN1_2314.t | 5782.71  | 663.68  | 3.12 | Up | Probable pyridoxal 5'-phosphate<br>synthase subunit SNO3 |
| LN1_1684.t | 181.45   | 20.79   | 3.12 | Up | Unknown                                                  |
| LN1_5136.t | 95.42    | 11.01   | 3.11 | Up | Unknown                                                  |
| LN1_6246.t | 1116.05  | 130.02  | 3.10 | Up | Unknown                                                  |
| LN1_0591.t | 508.80   | 59.35   | 3.10 | Up | ATP-dependent DNA helicase PIF1                          |
| LN1_1425.t | 204.58   | 24.23   | 3.08 | Up | Unknown                                                  |
| LN1_0291.t | 260.31   | 31.00   | 3.07 | Up | Beta-glucosidase 2                                       |
| LN1_1123.t | 424.61   | 51.10   | 3.05 | Up | Kinesin-like protein CIN8                                |
| LN1_1018.t | 97.52    | 12.00   | 3.04 | Up | Unknown                                                  |
| LN1_4483.t | 10797.54 | 1318.34 | 3.03 | Up | Low-specificity L-threonine aldolase                     |
| LN1_6456.t | 122.16   | 14.93   | 3.02 | Up | Unknown                                                  |
| LN1_4311.t | 31.66    | 3.97    | 3.02 | Up | Unknown                                                  |
| LN1_5319.t | 862.58   | 107.06  | 3.01 | Up | Flap endonuclease 1                                      |
| LN1_3881.t | 39.33    | 4.87    | 3.01 | Up | Unknown                                                  |
| LN1_4842.t | 166.16   | 20.62   | 3.00 | Up | Unknown                                                  |
| LN1_6172.t | 698.84   | 88.44   | 2.98 | Up | specific cyclin CCN1                                     |
| LN1_5858.t | 122.97   | 15.78   | 2.97 | Up | Unknown                                                  |



**Table S6** 50 down-regulated genes with expression ration of  $|\log_2 \text{TG/CG}| > 3.0$ .

| Gene ID    | TG_bas<br>eMean | CG_base<br>Mean | log2<br>ratio | Regula<br>tion | Annotation                                  |
|------------|-----------------|-----------------|---------------|----------------|---------------------------------------------|
| LN1_2214.t | 23.93           | 1103.92         | -5.53         | Down           | Proline-specific permease                   |
| LN1_2804.t | 6.82            | 275.67          | -5.34         | Down           | Unknown                                     |
| LN1_2803.t | 7.15            | 276.02          | -5.27         | Down           | Unknown                                     |
| LN1_0298.t | 302.89          | 10989.41        | -5.18         | Down           | Unknown                                     |
| LN1_6026.t | 37.21           | 1302.91         | -5.13         | Down           | Unknown                                     |
| LN1_6149.t | 53.29           | 1710.98         | -5.01         | Down           | Unknown                                     |
| LN1_0836.t | 32.12           | 1007.85         | -4.97         | Down           | High-affinity nicotinic acid<br>transporter |
| LN1_0835.t | 32.45           | 1008.19         | -4.96         | Down           | High-affinity nicotinic acid<br>transporter |
| LN1_2988.t | 328.37          | 10164.95        | -4.95         | Down           | Opaque-phase-specific protein<br>OP4        |
| LN1_3779.t | 159.77          | 4857.62         | -4.93         | Down           | Unknown                                     |
| LN1_2345.t | 103.00          | 2657.92         | -4.69         | Down           | Probable family 17 glucosidase<br>SCW4      |
| LN1_1885.t | 53.49           | 1343.34         | -4.65         | Down           | Unknown                                     |
| LN1_0426.t | 188.09          | 3612.13         | -4.26         | Down           | Unknown                                     |
| LN1_0198.t | 97.90           | 1799.42         | -4.20         | Down           | Maltose permease MAL61                      |
| LN1_0297.t | 680.81          | 12003.93        | -4.14         | Down           | Unknown                                     |
| LN1_3601.t | 49.75           | 727.47          | -3.87         | Down           | Allantoin permease OS                       |
| LN1_0462.t | 62.61           | 841.53          | -3.75         | Down           | Phenol 2-monooxygenase                      |
| LN1_2684.t | 227.13          | 3000.72         | -3.72         | Down           | Unknown                                     |
| LN1_3074.t | 326.86          | 4071.23         | -3.64         | Down           | Unknown                                     |
| LN1_0061.t | 2.91            | 35.91           | -3.63         | Down           | Unknown                                     |
| LN1_1413.t | 1122.46         | 13396.64        | -3.58         | Down           | Unknown                                     |
| LN1_2055.t | 537.24          | 6314.34         | -3.56         | Down           | Spermidine synthase                         |
| LN1_1933.t | 2.30            | 26.74           | -3.55         | Down           | Unknown                                     |
| LN1_0757.t | 1239.24         | 14147.21        | -3.51         | Down           | Unknown                                     |
| LN1_0327.t | 6365.88         | 72420.19        | -3.51         | Down           | Unknown                                     |
| LN1_1614.t | 99.83           | 1107.08         | -3.47         | Down           | Sulfate adenylyltransferase                 |
| LN1_3475.t | 117.50          | 1269.26         | -3.43         | Down           | Glutathione S-transferase 1                 |
| LN1_6301.t | 16.48           | 177.07          | -3.43         | Down           | Accumulation of dyads protein 2             |
| LN1_0066.t | 9306.64         | 99175.81        | -3.41         | Down           | Acetyl-coenzyme A synthetase 1              |
| LN1_4337.t | 461.18          | 4873.49         | -3.40         | Down           | Unknown                                     |
| LN1_3077.t | 1942.72         | 20062.90        | -3.37         | Down           | Sodium transport ATPase 1                   |
| LN1_2059.t | 207.86          | 2045.15         | -3.30         | Down           | Unknown                                     |
| LN1_0809.t | 588.98          | 5694.88         | -3.27         | Down           | Maltose permease MAL61                      |
| LN1_1600.t | 20.24           | 194.00          | -3.27         | Down           | Threonine--tRNA ligase,<br>cytoplasmic      |
| LN1_3627.t | 7578.64         | 72410.89        | -3.26         | Down           | Aldehyde dehydrogenase 5                    |

|            |         |          |       |      |                                                          |
|------------|---------|----------|-------|------|----------------------------------------------------------|
| LN1_1599.t | 20.54   | 194.00   | -3.25 | Down | Threonine--tRNA ligase,<br>cytoplasmic                   |
| LN1_5919.t | 3198.97 | 29636.22 | -3.21 | Down | Unknown                                                  |
| LN1_6044.t | 562.62  | 5044.86  | -3.16 | Down | N amino acid transport system<br>protein                 |
| LN1_6110.t | 2822.54 | 25307.70 | -3.16 | Down | Uncharacterized membrane<br>protein                      |
| LN1_0660.t | 346.32  | 3004.62  | -3.12 | Down | Unknown                                                  |
| LN1_3587.t | 1414.77 | 12274.57 | -3.12 | Down | Sorbose reductase homolog SOU2                           |
| LN1_2825.t | 205.53  | 1735.58  | -3.08 | Down | URIC_CYBJA Uricase                                       |
| LN1_4966.t | 1908.85 | 15979.20 | -3.07 | Down | Probable<br>methylmalonate-semialdehyde<br>dehydrogenase |
| LN1_2575.t | 411.90  | 3420.99  | -3.05 | Down | Cell wall protein RBR3                                   |
| LN1_2021.t | 1081.23 | 8822.90  | -3.03 | Down | Unknown                                                  |
| LN1_5288.t | 10.05   | 81.39    | -3.03 | Down | Agglutinin-like protein 1                                |
| LN1_5462.t | 61.65   | 484.69   | -2.98 | Down | Unknown                                                  |
| LN1_3494.t | 47.22   | 368.34   | -2.96 | Down | Formate dehydrogenase 1                                  |
| LN1_0659.t | 329.36  | 2563.00  | -2.96 | Down | Unknown                                                  |
| LN1_5485.t | 4.82    | 37.45    | -2.96 | Down | Unknown                                                  |

**Table S7** KEGG pathway enrichment of down-regulated genes for xenobiotics degradation, energy and carbohydrate metabolism.

| KEGG category | Definition                                  | Down-regulated genes in category | Number of DEGs in category | Ratio |
|---------------|---------------------------------------------|----------------------------------|----------------------------|-------|
| ko01220       | Degradation of aromatic compounds           | 13                               | 13                         | 1     |
| ko00362       | Benzoate degradation                        | 6                                | 6                          | 1     |
| ko00791       | Atrazine degradation                        | 2                                | 2                          | 1     |
| ko00624       | Polycyclic aromatic hydrocarbon degradation | 2                                | 2                          | 1     |
| ko00010       | Glycolysis                                  | 47                               | 48                         | 0.98  |
| ko04146       | Peroxisome                                  | 68                               | 70                         | 0.97  |
| ko00020       | Citrate cycle (TCA cycle)                   | 27                               | 28                         | 0.96  |
| ko02010       | ABC transporters                            | 22                               | 23                         | 0.96  |
| ko00511       | Other glycan degradation                    | 25                               | 27                         | 0.93  |
| ko00500       | Starch and sucrose metabolism               | 46                               | 51                         | 0.90  |

**Table S8** The DEGs involved in amino acid metabolism.

| KEGG category | Definition                                          | Number of DEGs in the category | Up-regulated genes in category | Down-regulated genes in category |
|---------------|-----------------------------------------------------|--------------------------------|--------------------------------|----------------------------------|
| ko00250       | Alanine, aspartate and glutamate metabolism         | 34                             | 4                              | 30                               |
| ko00260       | Glycine, serine and threonine metabolism            | 38                             | 9                              | 29                               |
| ko00270       | Cysteine and methionine metabolism                  | 39                             | 3                              | 36                               |
| ko00280       | Valine, leucine and isoleucine degradation          | 21                             | 1                              | 20                               |
| ko00290       | Valine, leucine and isoleucine biosynthesis         | 13                             | 1                              | 12                               |
| ko00300       | Lysine biosynthesis                                 | 13                             | 0                              | 13                               |
| ko00310       | Lysine degradation                                  | 23                             | 3                              | 20                               |
| ko00330       | Arginine and proline metabolism                     | 44                             | 7                              | 37                               |
| ko00340       | Histidine metabolism                                | 13                             | 1                              | 12                               |
| ko00350       | Tyrosine metabolism                                 | 25                             | 1                              | 24                               |
| ko00360       | Phenylalanine metabolism                            | 20                             | 3                              | 17                               |
| ko00380       | Tryptophan metabolism                               | 27                             | 3                              | 24                               |
| ko00400       | Phenylalanine, tyrosine and tryptophan biosynthesis | 19                             | 0                              | 19                               |

**Table S9** The DEGs with expression ratios of at least 8-fold associated with six KEGG categories of amino acid metabolism.

| KEGG category | Definition                                  | Up-regulated genes in category | Number of DEGs in category | Ratio |
|---------------|---------------------------------------------|--------------------------------|----------------------------|-------|
| ko00250       | Alanine, aspartate and glutamate metabolism | 3                              | 6                          | 0.5   |
| ko00260       | Glycine, serine and threonine metabolism    | 7                              | 14                         | 0.5   |
| ko00220       | Arginine biosynthesis                       | 1                              | 2                          | 0.5   |
| ko00350       | Tyrosine metabolism                         | 1                              | 2                          | 0.5   |
| ko00360       | Phenylalanine metabolism                    | 3                              | 3                          | 1     |
| ko00460       | Cyanoamino acid metabolism                  | 3                              | 3                          | 1     |

**Table S10** The DEGs involved in the category of DNA replication and repair.

| KEGG category | Definition                 | Number of DEGs in the category | Up-regulated genes in category | Down-regulated genes in category |
|---------------|----------------------------|--------------------------------|--------------------------------|----------------------------------|
| ko03030       | DNA replication            | 36                             | 13                             | 23                               |
| ko03410       | Base excision repair       | 22                             | 5                              | 17                               |
| ko03420       | Nucleotide excision repair | 42                             | 8                              | 34                               |
| ko03430       | Mismatch repair            | 22                             | 9                              | 13                               |
| ko03440       | Homologous recombination   | 22                             | 8                              | 14                               |
| ko03450       | Non-homologous end-joining | 7                              | 3                              | 4                                |

**Table S11** The DGEs with expression ratios of at least 8-fold involved in DNA replication and repair.

| KEGG category | Definition                 | Up-regulated genes in category | Number of DEGs in category | Ratio |
|---------------|----------------------------|--------------------------------|----------------------------|-------|
| ko03030       | DNA replication            | 13                             | 13                         | 1     |
| ko03410       | Base excision repair       | 5                              | 5                          | 1     |
| ko03430       | Mismatch repair            | 9                              | 9                          | 1     |
| ko03440       | Homologous recombination   | 8                              | 8                          | 1     |
| ko03450       | Non-homologous end-joining | 2                              | 2                          | 1     |

**Table S12** Reverse transcription quantitative PCR validation of the results of Illumina high throughput RNA-sequencing.

| Gene ID    | KEGG                                       | Function                               | Regulation | Expression fold change of TG/CG |         |
|------------|--------------------------------------------|----------------------------------------|------------|---------------------------------|---------|
|            |                                            |                                        |            | RNA-seq                         | RT-qPCR |
| LN1_5322.t | superoxide dismutase                       | response to superoxide                 | Up         | 2.37                            | 2.62    |
| LN1_4997.t | catalase                                   | response to oxidative stress           | Down       | -2.24                           | -3.20   |
| LN1_0659.t | glutamate decarboxylase                    | catalytic activity                     | Down       | -2.96                           | -2.36   |
| LN1_4655.t | bloom syndrome protein                     | regulation of DNA recombination        | Up         | 1.95                            | 2.10    |
| LN1_4623.t | DNA repair and recombination protein RAD54 | telomere maintenance                   | Up         | 1.39                            | 1.27    |
| LN1_4135.t | ATP-dependent DNA helicase 2 subunit 1     | telomere maintenance                   | Up         | 1.85                            | 1.87    |
| LN1_5319.t | flap endonuclease-1                        | telomere maintenance                   | Up         | 3.01                            | 3.78    |
| LN1_1509.t | NAD(P)H dehydrogenase                      | extracellular region                   | Down       | -2.74                           | -3.43   |
| LN1_5075.t | NADH dehydrogenase alpha                   | organic substance biosynthetic process | Down       | -1.86                           | -2.93   |
| LN1_2055.t | spermidine synthase                        | catalytic activity                     | Down       | -3.56                           | -5.17   |
| LN1_0066.t | acetyl-CoA synthetase                      | catalytic activity                     | Down       | -3.43                           | -6.19   |
| LN1_3077.t | Na <sup>+</sup> -exporting ATPase          | catalytic activity                     | Down       | -3.37                           | -5.10   |
| LN1_1979.t | Spore wall maturation protein DIT1         | cell wall biogenesis                   | Up         | 8.56                            | 9.00    |
| LN1_3339.t | multidrug resistance protein               | transporter activity                   | Up         | 4.94                            | 4.23    |
| LN1_2724.t | NADPH-dependent methylglyoxal reductase    | carbonyl reductase (NADPH) activity    | Up         | 4.71                            | 4.20    |
| LN1_4493.t | DNA polymerase alpha subunit A             | DNA replication checkpoint             | Up         | 4.17                            | 3.71    |
| LN1_4412.t | Azole resistance protein 1                 | secondary metabolic process            | Up         | 4.03                            | 3.41    |
| LN1_0574.t | structural maintenance of chromosome 3     | condensed nuclear chromosome           | Up         | 3.94                            | 4.23    |
| LN1_0905.t | DNA polymerase alpha subunit B             | alpha DNA polymerase:primase           | Up         | 3.72                            | 2.99    |
| LN1_2072.t | replication factor A2                      | telomere maintenance                   | Up         | 3.29                            | 3.39    |



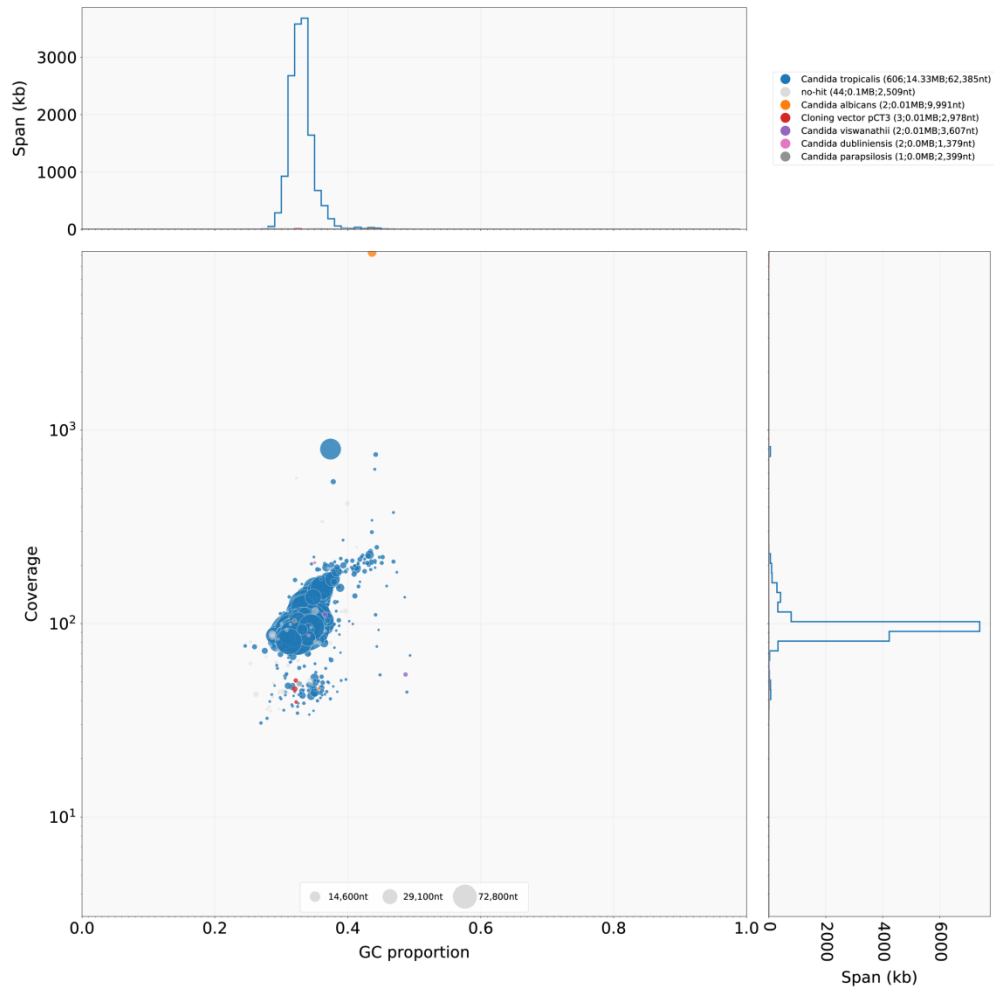

**Fig. S1.** Visualization of the assembly of sequencing library. Sequences in the assembly are depicted as circles, with diameter scaled proportional to sequence length and taxonomic annotation with different color.

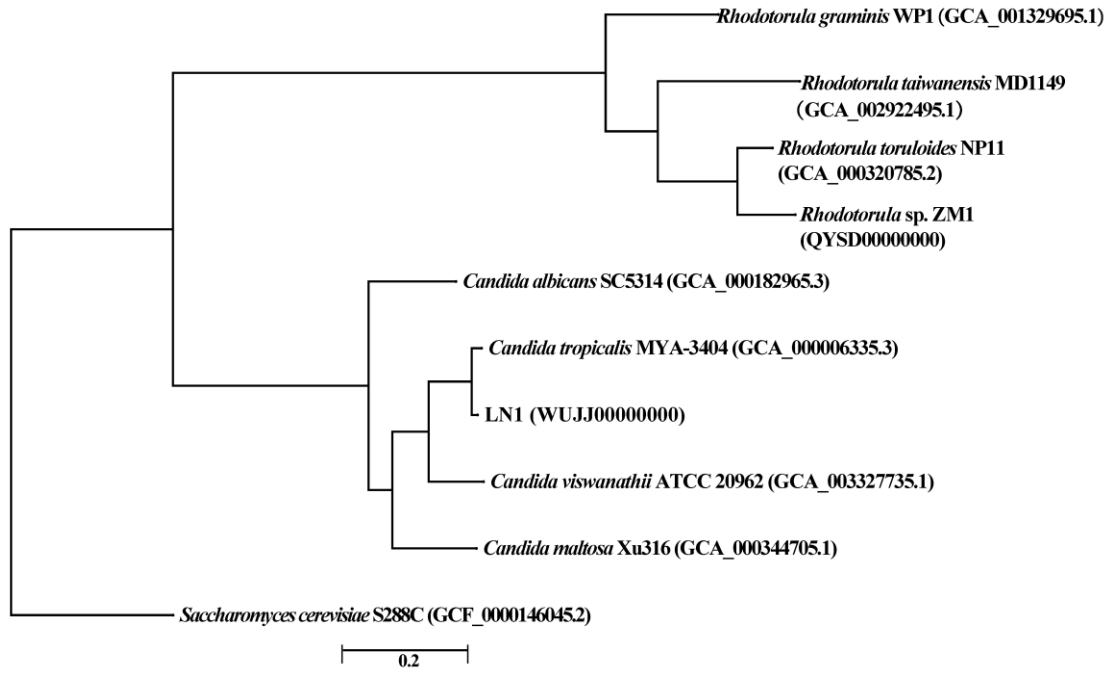

**Fig. S2.** Maximum-likelihood species tree based on genome sequences showing the relationship of the strain LN1 and eight of their related GenBank genome sequences. Bootstrap values of above 50% are shown at the branch points. *Saccharomyces cerevisiae* S288C was used as an outgroup.

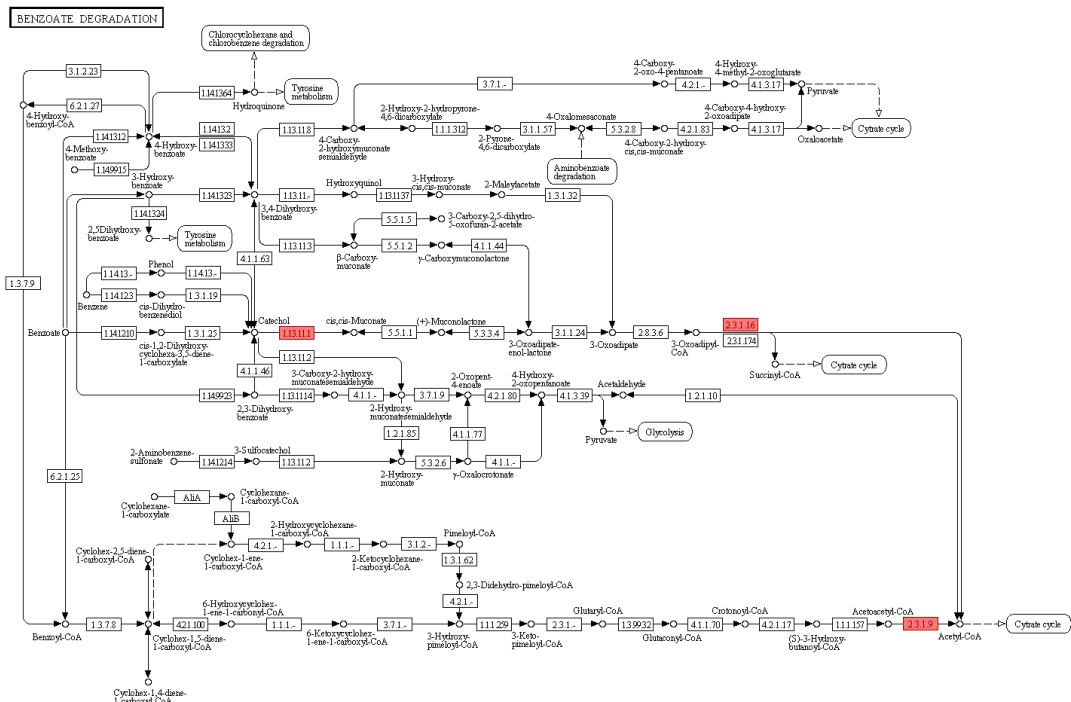

**Fig. S3.** Genes involved in benzoate degradation pathway. The red box means the enzymes encoded by the detected genes in the strain LN1.

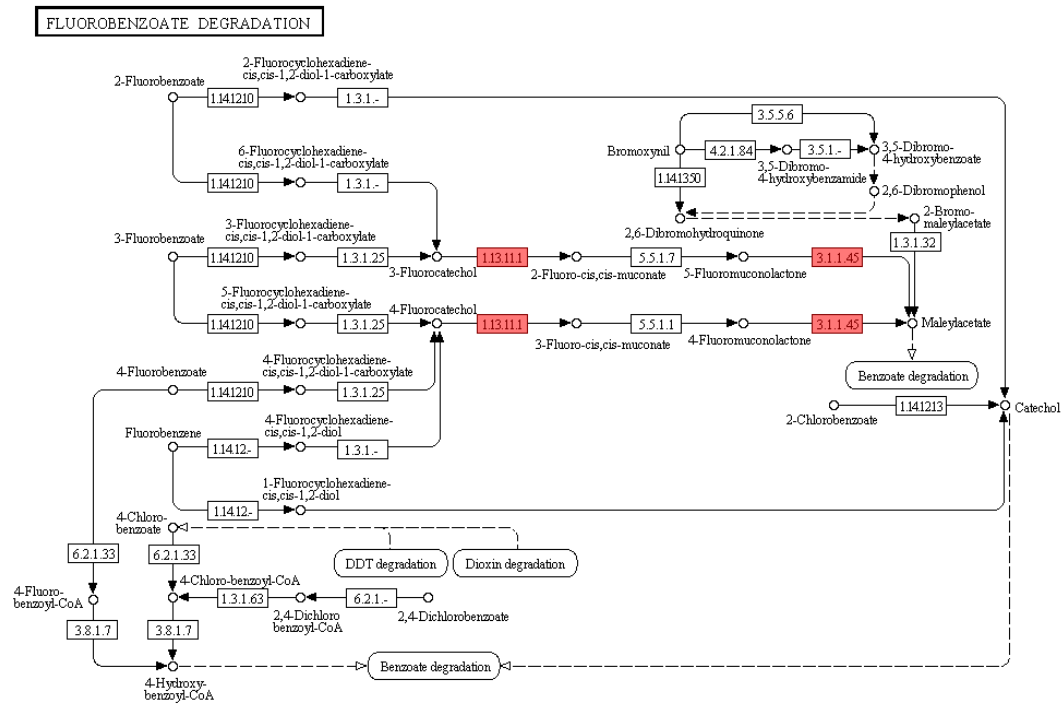

**Fig. S4.** Genes involved in fluorobenzoate degradation pathway. The red box means the enzymes encoded by the detected genes in the strain LN1.

TOLUENE DEGRADATION

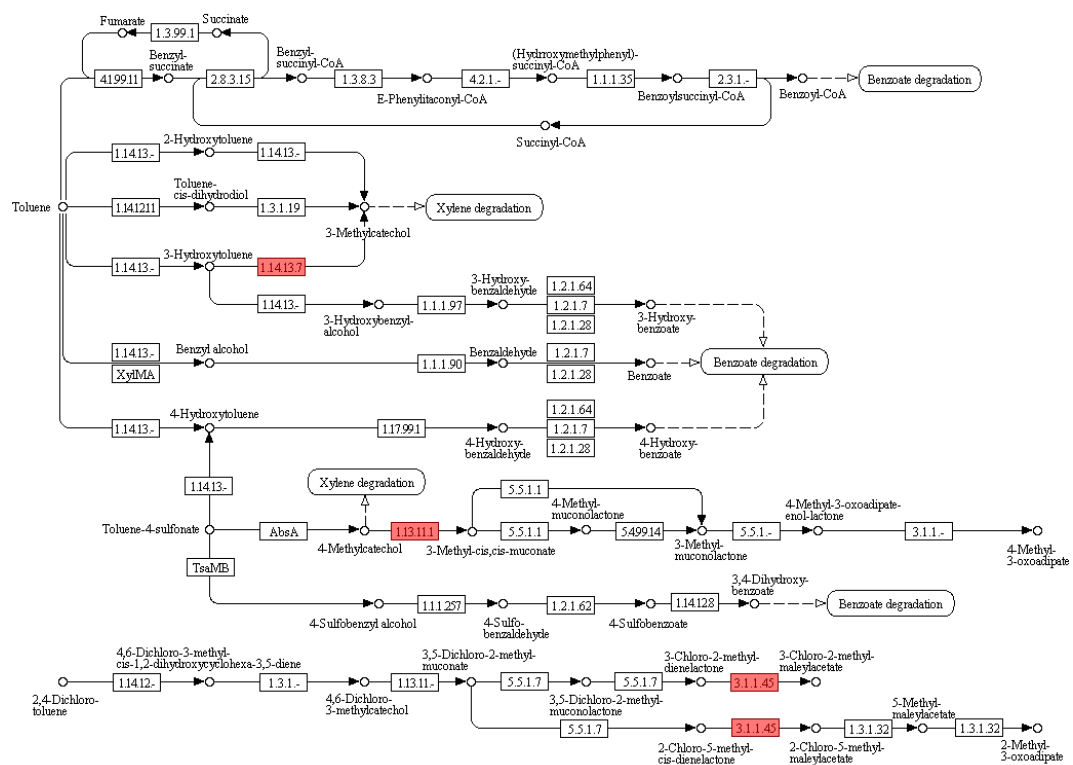

**Fig. S5.** Genes involved in toluene degradation pathway. The red box means the enzymes encoded by the detected genes in the strain LN1.

CHLOROCYCLOHEXANE AND CHLOROBENZENE DEGRADATION

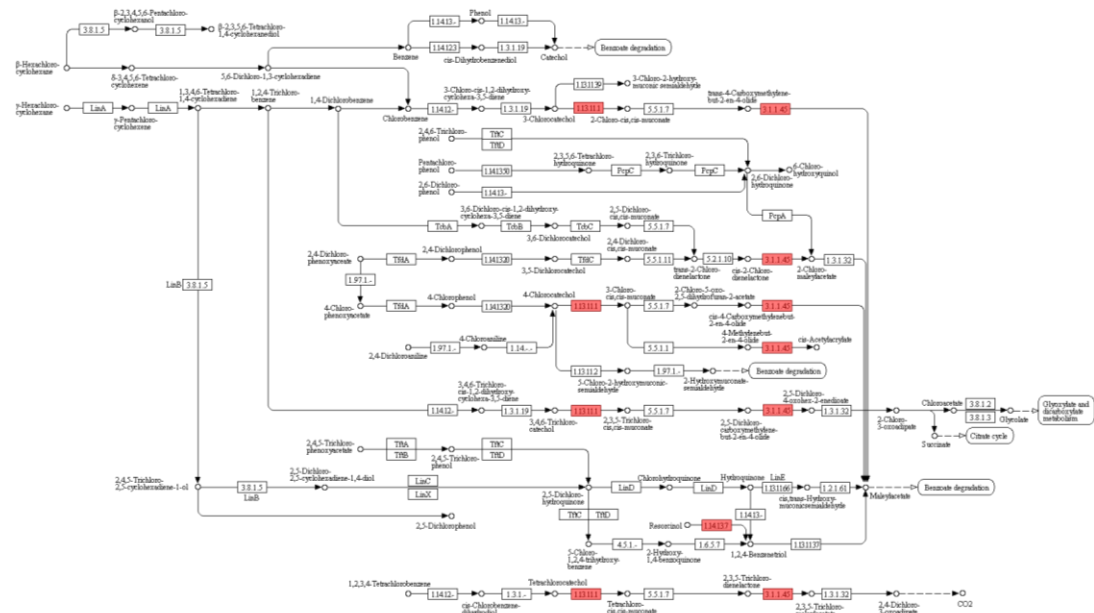

**Fig. S6.** Genes involved in chlorocyclohexane and chlorobenzene degradation pathway. The red box means the enzymes encoded by the detected genes in the strain LN1.

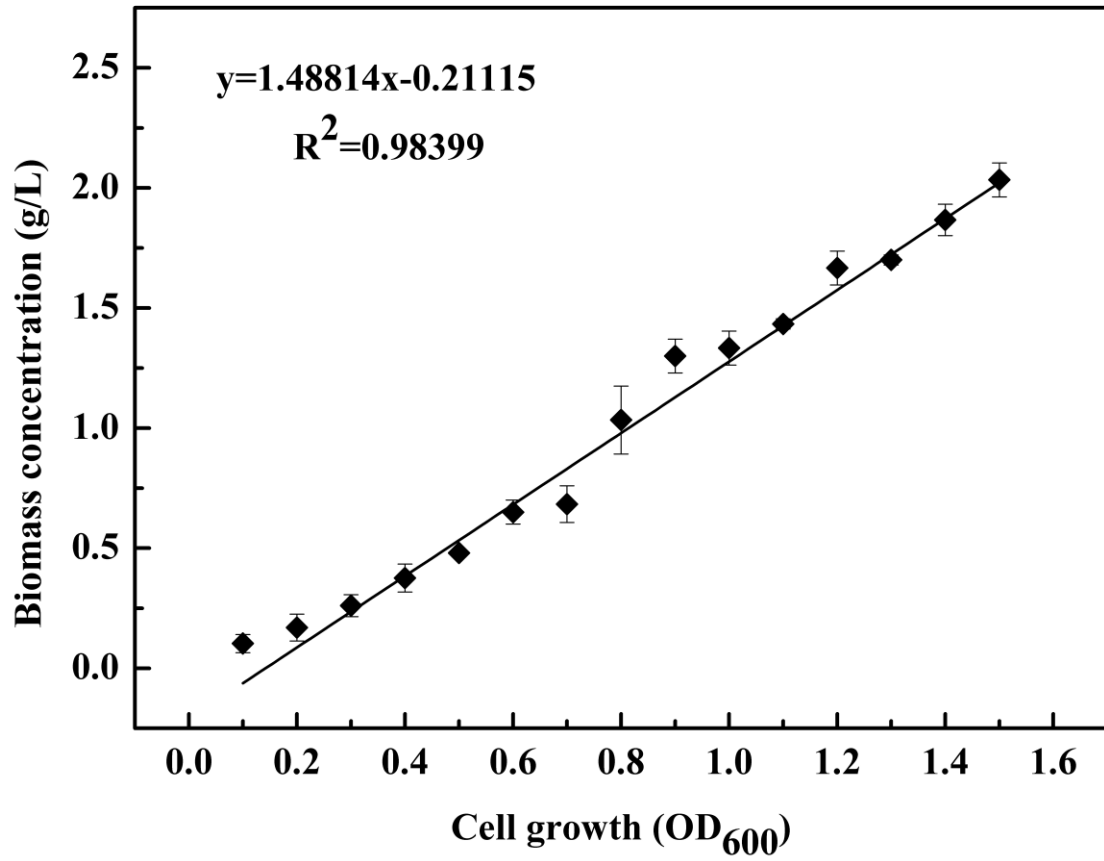

**Fig. S7.** The relationships of cell growth (OD<sub>600</sub>) with biomass concentration.

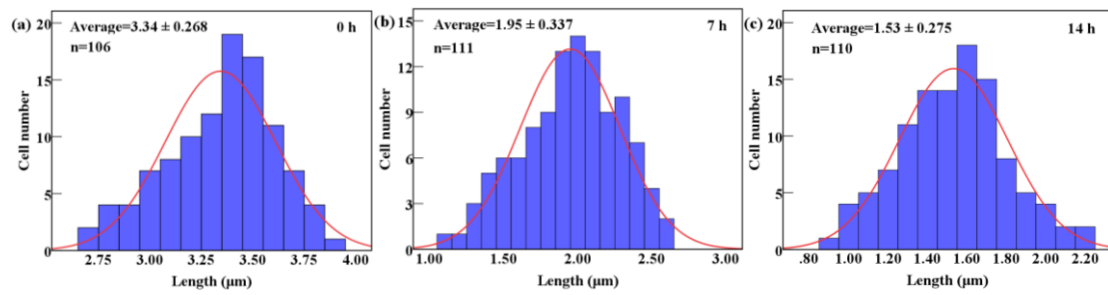

**Fig. S8.** Lengths of *Candida* sp. LN1 observed under a scanning electron microscope. Strain LN1 was incubated at MSM with 6000 mg/L phenol, and the length changes were observed at 0 h (a), 7 h (b) and 14 h (c).



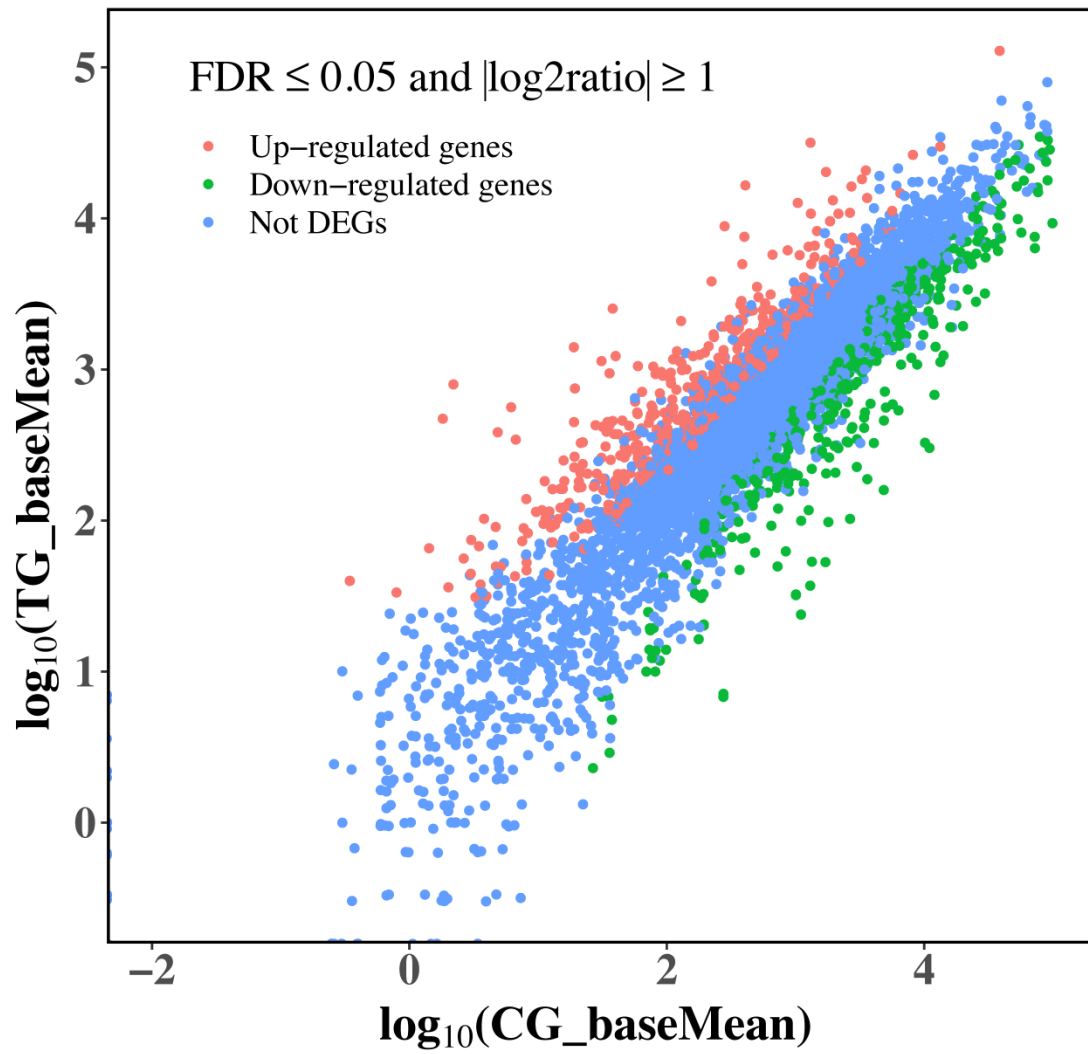

**Fig. S9.** Differentially expressed genes in the VBNC cells (TGs) compared to those in normal cells (CGs).

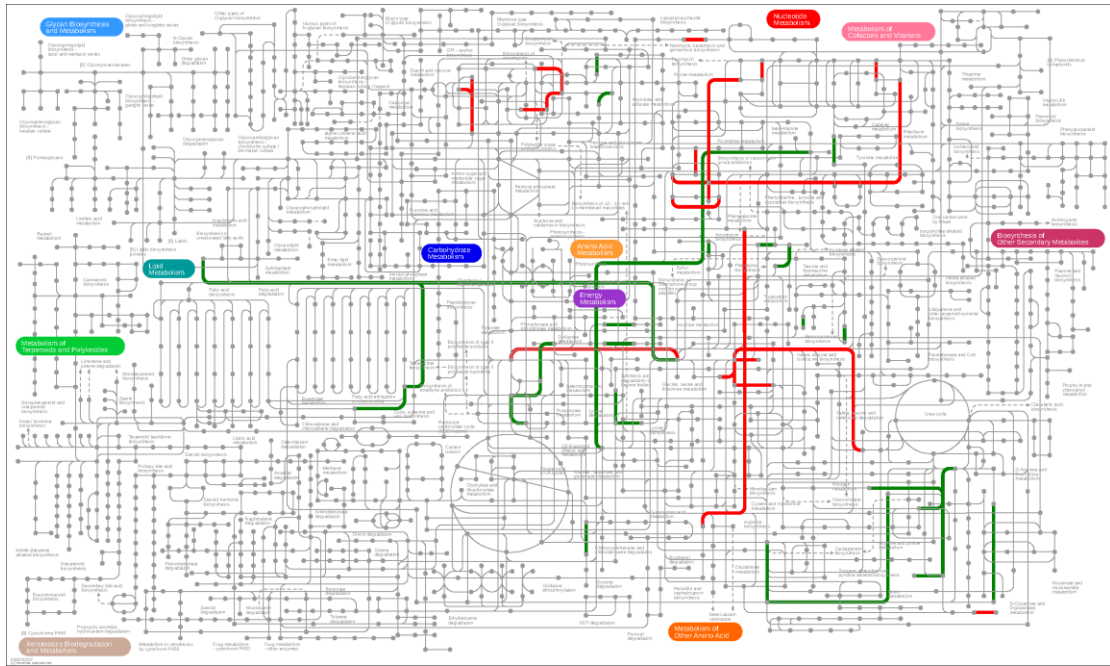

**Fig. S10.** The mapping KEGG pathway of the 98 up-and 50-down-regulated (red and green lines) genes.

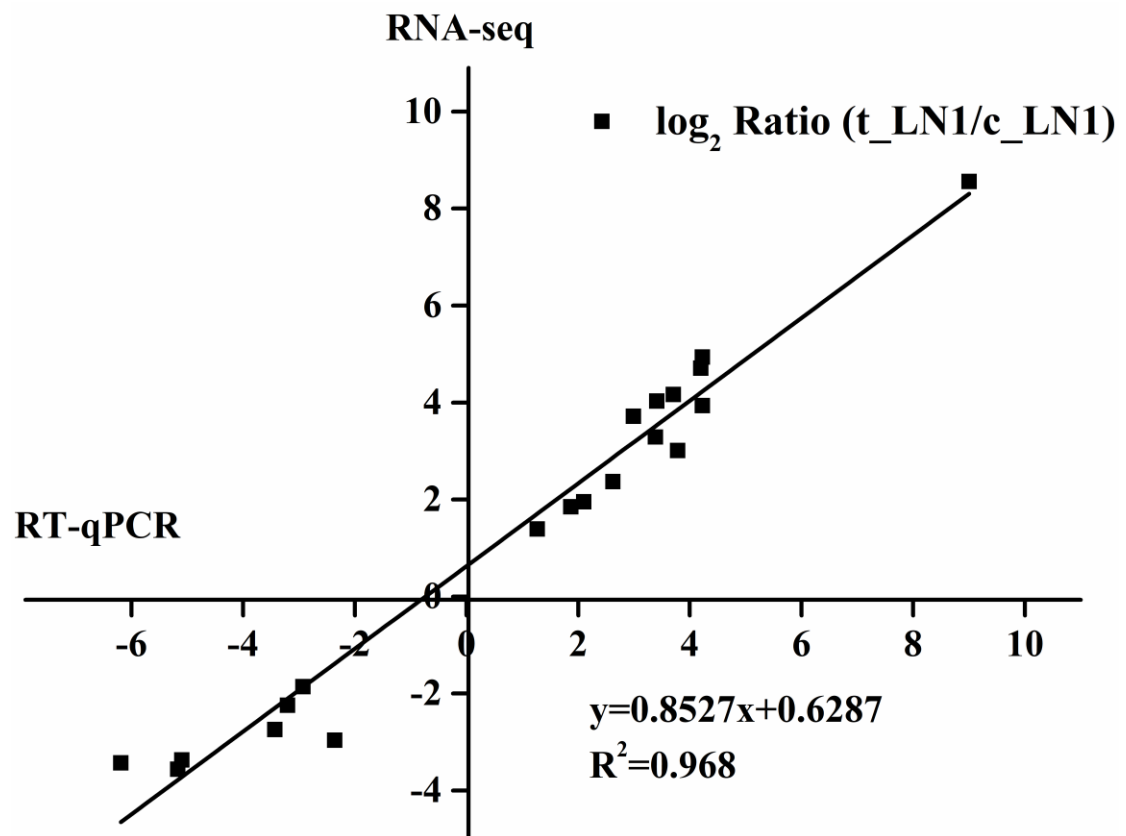

**Fig. S11.** Reverse transcription quantitative PCR (RT-qPCR) validation analysis of RNA-seq results with selected twenty genes.

## References

1. Maquelin K, Kirschner C, Choo-Smith LP, van den Braak N, Endtz HP, Naumann D, Puppels GJ. 2002. Identification of medically relevant microorganisms by vibrational spectroscopy. *J Microbiol Meth* 51:255-271.
2. Edwards H, Russell N, Weinstein R, Wynn-Williams D. 1995. Fourier transform Raman spectroscopic study of fungi. *J Raman Spectrosc* 26:911-916.
3. Harz M, Rösch P, Popp J. 2009. Vibrational spectroscopy-A powerful tool for the rapid identification of microbial cells at the single-cell level. *Cytom Part A* 75:104-113.
4. Harz M, Rösch P, Peschke KD, Ronneberger O, Burkhardt H, Popp J. 2005. Micro-Raman spectroscopic identification of bacterial cells of the genus *Staphylococcus* and dependence on their cultivation conditions. *Analyst* 130:1543-1550.
5. Harz M, Kiehntopf M, Stöckel S, Rösch P, Straube E, Deufel T, Popp J. 2009. Direct analysis of clinical relevant single bacterial cells from cerebrospinal fluid during bacterial meningitis by means of micro-Raman spectroscopy. *J Biophotonics* 2:70-80.
6. Williams A, Edwards H. 1994. Fourier transform Raman spectroscopy of bacterial cell walls. *J Raman Spectrosc* 25:673-677.
